# Supplementary material for: Endothelial Dysfunction, Increased Arterial Stiffness, and Cardiovascular Risk Prediction in Patients With Coronary Artery Disease: FMD‐J (Flow‐Mediated Dilation Japan) Study A
Source: PubMed Central journal article supplement — J Am Heart Assoc. 2018 Jul 12;7(14):e008588. doi: 10.1161/JAHA.118.008588 (PMC6064856; doi:10.1161/jaha.118.008588), 2018-07-12
Supplement: JAH3-7-e008588-s001.pdf [file JAH3-7-e008588-s001.pdf]

# **Supplemental Material**

**Table S1. Clinical Characteristics of the Included Subjects and Excluded Subjects without baPWV Measurement.**

| Variables                             | Included<br>(n=462) | Excluded<br>(n=104) | P value |
|---------------------------------------|---------------------|---------------------|---------|
| Age, yr                               | 63.8±8.7            | 63.3±8.0            | 0.63    |
| Men, n (%)                            | 396 (85.7)          | 85 (81.7)           | 0.31    |
| Body mass index, kg/m <sup>2</sup>    | 24.8±3.6            | 25.2±3.8            | 0.34    |
| Systolic blood pressure, mm Hg        | 129.0±16.2          | 125.9±15.6          | 0.08    |
| Diastolic blood pressure, mm Hg       | 74.8±10.6           | 72.6±10.6           | 0.06    |
| Heart rate, bpm                       | 66.5±12.0           | 66.6±11.6           | 0.95    |
| Total cholesterol, mg/dL              | 169.9±31.7          | 163.7±27.8          | 0.07    |
| Triglycerides, mg/dL                  | 138.0±94.0          | 133.1±62.1          | 0.61    |
| HDL cholesterol, mg/dL                | 50.4±13.1           | 47.6±12.9           | 0.04    |
| LDL cholesterol, mg/dL                | 92.8±27.4           | 89.5±25.3           | 0.26    |
| Glucose, mg/dL                        | 119.5±37.2          | 108.6±27.7          | 0.005   |
| HbA1c, % (n=347)                      | 6.4±1.0             | 6.4±1.0             | 0.96    |
| Creatinine, mg/dL                     | 0.85±0.24           | 0.88±0.25           | 0.37    |
| eGFR, ml/min/1.73 m <sup>2</sup>      | 71.9±17.6           | 68.9±15.4           | 0.11    |
| Smoker, n (%)                         | 313 (70.2)          | 78 (76.5)           | 0.20    |
| Complications, n (%)                  |                     |                     |         |
| Hypertension                          | 433 (93.7)          | 100 (96.2)          | 0.32    |
| Dyslipidemia                          | 436 (94.4)          | 98 (94.2)           | 0.96    |
| Diabetes mellitus                     | 178 (38.5)          | 36 (34.6)           | 0.46    |
| Prior myocardial infarction           | 244 (52.8)          | 43 (41.4)           | 0.03    |
| Prior coronary intervention           | 404 (87.4)          | 97 (93.3)           | 0.07    |
| Medication use, n (%)                 |                     |                     |         |
| Antiplatelet drugs                    | 454 (98.3)          | 100 (96.2)          | 0.21    |
| ARBs/ACEIs                            | 320 (69.3)          | 69 (66.4)           | 0.56    |
| β-blockers                            | 219 (47.4)          | 47 (45.2)           | 0.68    |
| Antidiabetic drugs                    | 145 (31.4)          | 31 (29.8)           | 0.75    |
| Statins                               | 394 (85.3)          | 89 (85.6)           | 0.94    |
| Left ventricular ejection fraction, % | 60.8±9.9            | 60.6±11.4           | 0.83    |
| BNP, pg/mL                            | 35.1±61.6           | 57.0±112.3          | 0.007   |
| FMD, %                                | 4.8±2.6             | 4.9±2.9             | 0.53    |

All results are presented as mean±SD.

HDL, high-density lipoprotein; LDL, low-density lipoprotein; eGFR, estimated glomerular filtration rate; ARB, angiotensin receptor blocker; ACEI, angiotensin-converting enzyme inhibitor; BNP, brain natriuretic peptide; FMD, flow-mediated vasodilation; baPWV, brachial ankle pulse wave velocity.
